# Supplementary figures and images for: Unveiling the Core Effector Proteins of Oil Palm Pathogen <i>Ganoderma boninense</i> via Pan-secretome Analysis
Source: Preprints.org preprint supplement (doi:10.20944/preprints202206.0376.v1), 2022-06-28

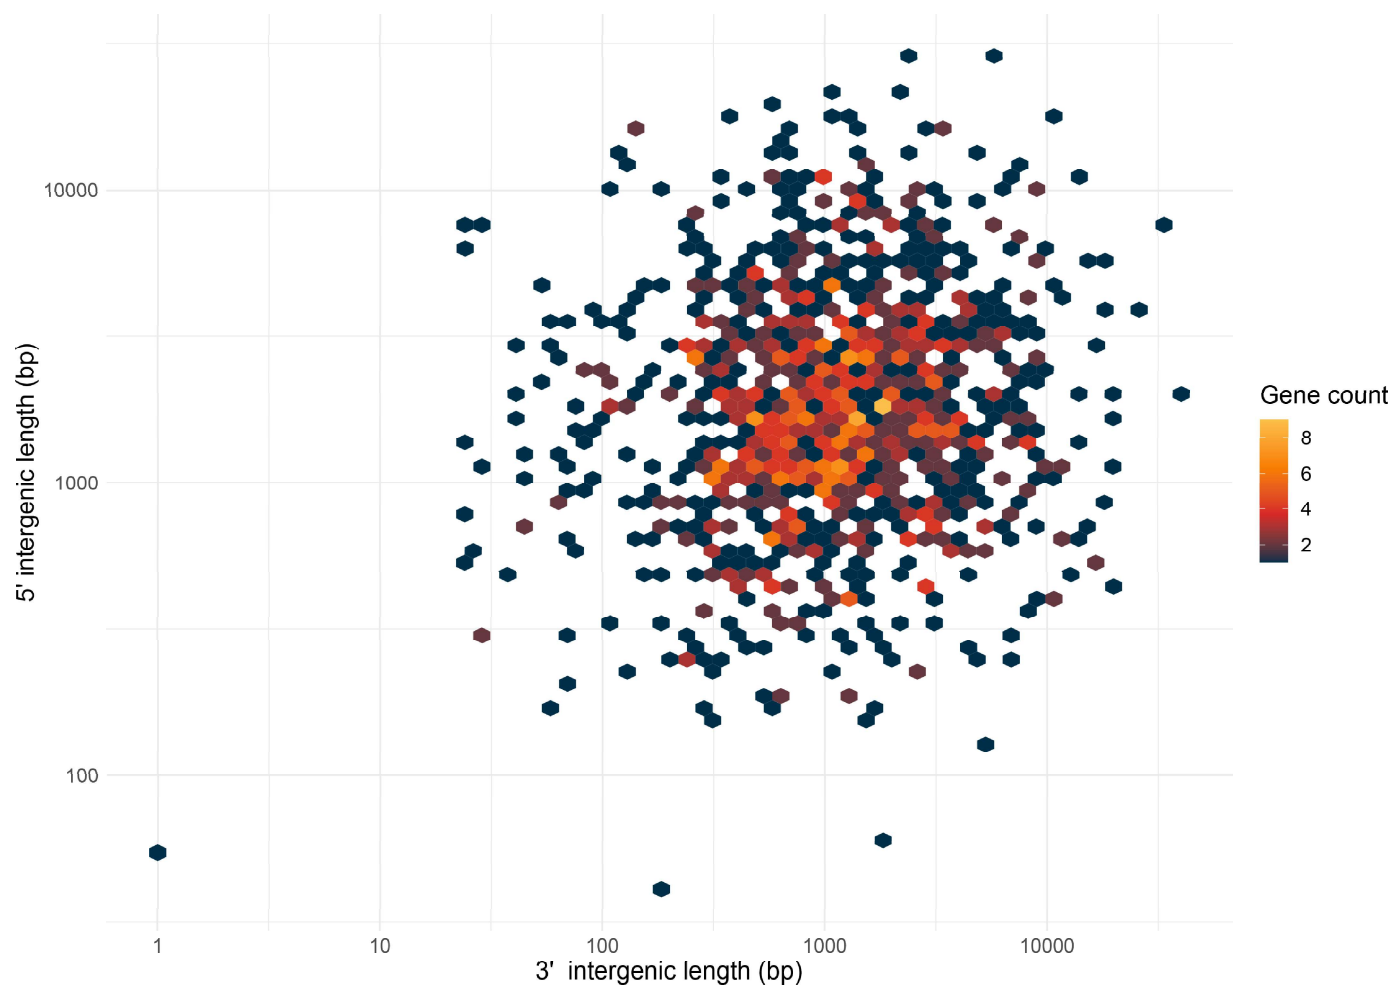

Supplement: Supplementary file 1 [file supplementary]

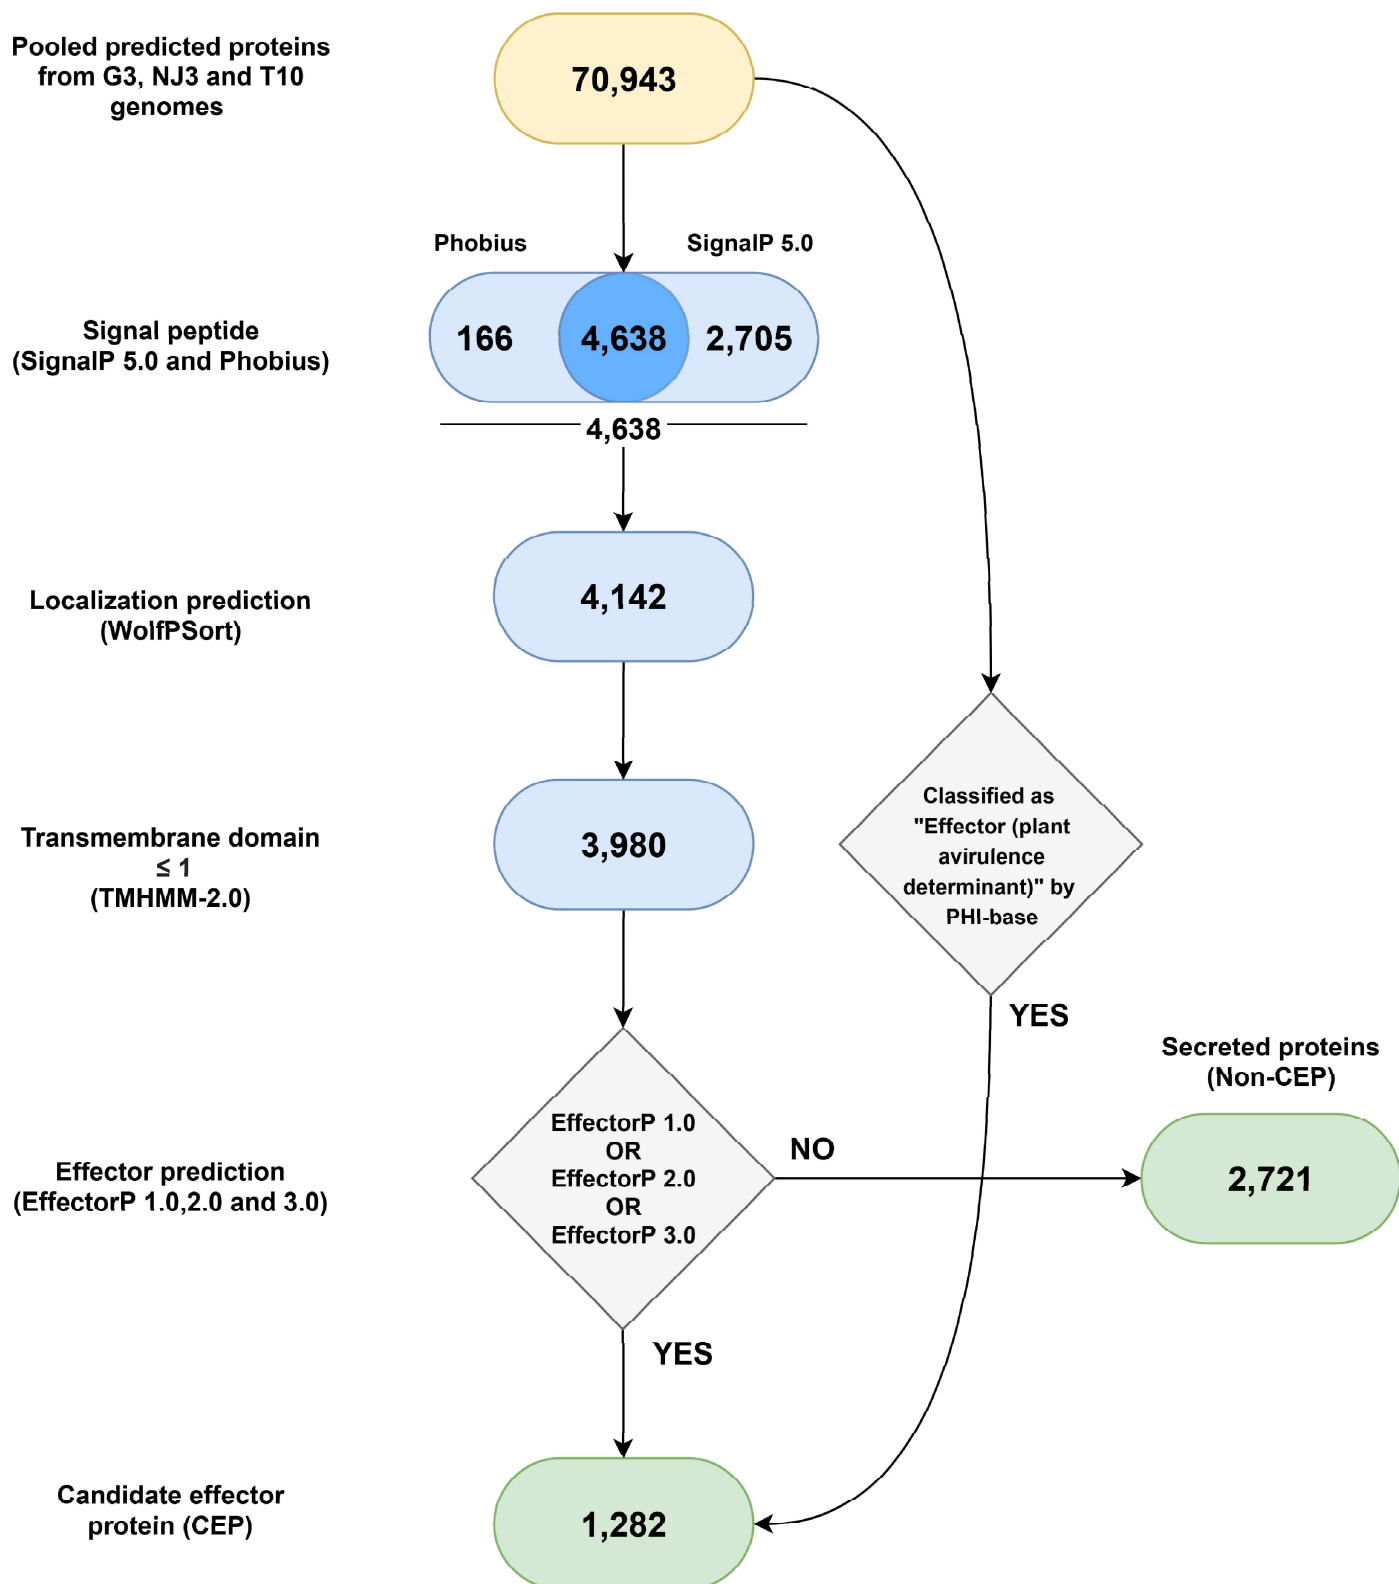

Supplement: Supplementary file 2 [file supplementary]
